# Supplementary material for: Characteristics of registered and published systematic reviews focusing on the prevention of COVID-19: a meta-research study
Source: HighWire-hosted journal article supplement (doi:10.1136/bmjopen-2021-060255), 2022-05-01
Supplement: bmjopen-2021-060255supp005_data_supplement.pdf [file bmjopen-2021-060255supp005_data_supplement.pdf]

## S5. Comparison of the methodologies described in PROSPERO and in the published systematic reviews

Table 4: Comparison of the methodology between protocols in our PROSPERO sample for which we also identified a full text publication by 05/05/2021 with their assigned full text publication

|    | Author, Year                                                                                                                                                                                                                                          | PROSPERO registration                                                                                                                                                                                                                                                                                                                                                   | Published systematic review                                                                                                                                                                                                                                                                                                                                             | Differences between PROSPERO registration and published systematic review*                                                                                                                                                                                                                                                   |
|----|-------------------------------------------------------------------------------------------------------------------------------------------------------------------------------------------------------------------------------------------------------|-------------------------------------------------------------------------------------------------------------------------------------------------------------------------------------------------------------------------------------------------------------------------------------------------------------------------------------------------------------------------|-------------------------------------------------------------------------------------------------------------------------------------------------------------------------------------------------------------------------------------------------------------------------------------------------------------------------------------------------------------------------|------------------------------------------------------------------------------------------------------------------------------------------------------------------------------------------------------------------------------------------------------------------------------------------------------------------------------|
| 1. | <b>Frazer, 2020</b><br>Link to the PROSPERO: <a href="https://dx.doi.org/10.1101/2020.10.19.20222182">191569</a><br>Link to the fulltext: <a href="https://dx.doi.org/10.1101/2020.10.19.20222182">https://dx.doi.org/10.1101/2020.10.19.20222182</a> | <u>Review type:</u> Systematic review<br><u>Predefined databases to be searched:</u> PubMed, EMBASE, CINAHL and the Cochrane Library, MedRxiv and Google Scholar<br><u>Predefined risk of bias:</u> Narrative summary of methodological quality (first version: Cochrane RoB tool and CASP)<br><u>Predefined main outcomes:</u> Not specified                           | <u>Review type/methodology:</u> Rapid systematic review (preprint)<br><u>Databases searched:</u> Medline, EMBASE, CINAHL, Cochrane Library, MedRxiv<br><u>Risk of bias:</u> MMAT<br><u>Main outcomes:</u> Morbidity data, case fatality rates, reductions in reported transmission rates, and facility characteristics associated with COVID-19 incidence               | 1) Rapid review methodology (instead of predefined systematic review)<br>2) Risk of bias assessment tool changed => no impact because it's a reliable tool<br>3) Main outcomes: Outcomes were not predefined in the protocol<br><br>Overall: Some concerns regarding the selection of the reported results                   |
| 2. | <b>Juneau, 2020</b><br>Link to the PROSPERO: <a href="https://dx.doi.org/10.1101/2020.07.23.20160234">198462</a><br>Link to the fulltext: <a href="https://dx.doi.org/10.1101/2020.07.23.20160234">https://dx.doi.org/10.1101/2020.07.23.20160234</a> | <u>Review type:</u> Systematic review<br><u>Predefined databases to be searched:</u> Medline, EMBASE, Global Health, EBM Reviews<br><u>Predefined risk of bias:</u> Grouping of studies based on design into higher quality (randomized trials) and lower quality (other designs)<br><u>Predefined main outcomes:</u> R <sub>0</sub> and other measures of transmission | <u>Review type/methodology:</u> Systematic review (preprint)<br><u>Databases searched:</u> Medline, EMBASE, Global Health, EBM Reviews<br><u>Data synthesis:</u> Tabular description of study characteristics and main findings<br><u>Risk of bias:</u> Risk of bias was not assessed<br><u>Main outcomes:</u> Contact tracing effectiveness in the context of COVID-19 | 1) Risk of bias was not assessed as indicated in the PROSPERO registration => Impacts the validity of the review results<br>2) Main outcomes differed slightly in their definition => most likely has no impact on the published systematic reviews<br><br>Overall: Some concerns regarding missing risk of bias assessment. |
| 3. | <b>Chisale, 2020</b><br>Link to the PROSPERO: <a href="https://dx.doi.org/10.21203/rs.3.rs-98441/v1">204984</a><br>Link to the fulltext: <a href="https://dx.doi.org/10.21203/rs.3.rs-98441/v1">https://dx.doi.org/10.21203/rs.3.rs-98441/v1</a>      | <u>Review type:</u> Systematic review<br><u>Predefined databases to be searched:</u> PubMed, EMBASE, PsycINFO, AMED, CINAHL, DOAJ, Medline and Google Scholar<br><u>Predefined risk of bias:</u> MMAT<br><u>Predefined main outcomes:</u> Reduction in the incidence of COVID-19                                                                                        | <u>Review type/methodology:</u> Systematic review (preprint)<br><u>Databases searched:</u> PubMed, EMBASE, PsycINFO, AMED, CINAHL, DOAJ, Medline and Google Scholar<br><u>Risk of bias:</u> MMAT<br><u>Main outcomes:</u> To identify community-based interventions used to prevent COVID-19 in low- and middle-income countries                                        | Main outcomes: Outcomes changed<br><br>Overall: Some concerns regarding the selection of the reported result                                                                                                                                                                                                                 |

|    |                                                                                                                                                                                                                                                                                                                                                                                                                                                                                                                                                                                                                                                              |                                                                                                                                                                                                                                                                                                                                                                                                                                                                                                                                                                                |                                                                                                                                                                                                                                                                                                                                                                                                                                                                                                                                                                           |                                                                                                                                                                                                                                       |
|----|--------------------------------------------------------------------------------------------------------------------------------------------------------------------------------------------------------------------------------------------------------------------------------------------------------------------------------------------------------------------------------------------------------------------------------------------------------------------------------------------------------------------------------------------------------------------------------------------------------------------------------------------------------------|--------------------------------------------------------------------------------------------------------------------------------------------------------------------------------------------------------------------------------------------------------------------------------------------------------------------------------------------------------------------------------------------------------------------------------------------------------------------------------------------------------------------------------------------------------------------------------|---------------------------------------------------------------------------------------------------------------------------------------------------------------------------------------------------------------------------------------------------------------------------------------------------------------------------------------------------------------------------------------------------------------------------------------------------------------------------------------------------------------------------------------------------------------------------|---------------------------------------------------------------------------------------------------------------------------------------------------------------------------------------------------------------------------------------|
| 4. | <p><b>Public Health England, 2021</b></p> <p>Link to the PROSPERO: <a href="https://doi.org/10.1136/2021-060255">191867</a></p> <p>Link to the fulltext (Update 2): <a href="https://phe.koha-ptfs.co.uk/cgi-bin/koha/opac-retrieve-file.pl?id=9adedb17d5622f9cd7e42febcbadb19ad">https://phe.koha-ptfs.co.uk/cgi-bin/koha/opac-retrieve-file.pl?id=9adedb17d5622f9cd7e42febcbadb19ad</a></p> <p>original version: <a href="https://ukhsa.koha-ptfs.co.uk/cgi-bin/koha/opac-de-tail.pl?biblionumber=62728&amp;query_desc=covid%20school">https://ukhsa.koha-ptfs.co.uk/cgi-bin/koha/opac-de-tail.pl?biblionumber=62728&amp;query_desc=covid%20school</a></p> | <p><u>Review type:</u> Rapid Review</p> <p><u>Predefined databases to be searched:</u> Medline, EMBASE, MedRxiv, WHO COVID-19 Research Database and Google Scholar</p> <p><u>Predefined risk of bias:</u> Evaluation of papers based on study design and main sources of bias, validated tools will not be used for primary studies</p> <p><u>Predefined main outcomes:</u> SARS-CoV-2 infection rate in children and staff, transmission of SARS-CoV-2 within school settings, COVID-19 outbreaks in schools.</p>                                                             | <p><u>Review type/methodology:</u> Rapid review (Online document without external peer-review)</p> <p><u>Databases searched:</u> Medline, EMBASE, MedRxiv, WHO COVID-19 Database (2-weekly updates) and Google Scholar (first version only)</p> <p><u>Risk of bias:</u> Quality criteria checklist for primary research</p> <p><u>Main outcomes:</u> SARS-CoV-2 infection rate in children and staff, transmission of SARS-CoV-2 within school settings, COVID-19 outbreaks in schools</p>                                                                                | <p>No changes in the review methodology were identified.</p> <p>Overall: No major concerns.</p>                                                                                                                                       |
| 5. | <p><b>Chu, 2020</b></p> <p>Link to the PROSPERO: <a href="https://doi.org/10.1136/2020-060255">177047</a></p> <p>Link to the fulltext: <a href="https://dx.doi.org/10.1016/S0140-6736(20)31142-9">https://dx.doi.org/10.1016/S0140-6736(20)31142-9</a></p>                                                                                                                                                                                                                                                                                                                                                                                                   | <p><u>Review type:</u> Rapid systematic review</p> <p><u>Predefined databases to be searched:</u> PubMed, Medline, EMBASE, CINAHL, and the Cochrane Library, three Chinese databases and four COVID-19 specific databases (e.g., COVID-19 WHO, COVID-19 L-OVE), two platforms for trial registries</p> <p><u>Predefined risk of bias:</u> Cochrane RoB tool for RCTs and Newcastle-Ottawa Scale for non-RCTs</p> <p><u>Predefined main outcomes:</u> Transmission (confirmed or probable), acceptability, harms, COVID-19 infection, ICU admission and other main outcomes</p> | <p><u>Review type/methodology:</u> Systematic review with meta-analysis (peer-reviewed journal publication)</p> <p><u>Databases searched:</u> PubMed, Medline, EMBASE, CINAHL, and the Cochrane Library, four COVID-19 specific databases, WHO ICTRP, ClinicalTrials.gov</p> <p><u>Risk of bias:</u> Newcastle-Ottawa Scale was used for non-RCTs</p> <p><u>Main outcomes:</u> Risk of transmission (confirmed or probable; COVID-19, SARS or MERS), hospitalization, ICU admission, death, time to recovery, and other main outcomes (similar to the PROSPERO entry)</p> | <p>The review type changed (improved) from Rapid review to Systematic review.</p> <p>Overall: No major concerns.</p>                                                                                                                  |
| 6. | <p><b>Johanna, 2020</b></p> <p>Link to the PROSPERO: <a href="https://doi.org/10.1136/2020-060255">190546</a></p> <p>Link to the fulltext: <a href="https://dx.doi.org/10.4081/jphr.2020.2011">https://dx.doi.org/10.4081/jphr.2020.2011</a></p>                                                                                                                                                                                                                                                                                                                                                                                                             | <p><u>Review type:</u> Rapid systematic review</p> <p><u>Predefined databases to be searched:</u> Medline, EMBASE, CINAHL, Cochrane Library, ScienceDirect, ProQuest, WHO SEARO database, Scopus, Wiley Library, Sage Journals, Taylor&amp;Francis, SpringerLink, Hindawi, DOAJ</p> <p><u>Predefined risk of bias:</u> EPHPP tool</p> <p><u>Predefined main outcomes:</u> Incident cases, onward transmission, mortality, resource use</p>                                                                                                                                     | <p><u>Review type/methodology:</u> Systematic review (peer-reviewed journal publication)</p> <p><u>Databases searched:</u> Medline, Cochrane Library, CINAHL, DOAJ, ProQuest, Sage Journals, Science Direct, Pubmed, Scopus, WHO Global Index Mediscus, Wiley Library, clinical trial registries</p> <p><u>Risk of bias:</u> EPHPP tool</p> <p><u>Main outcomes:</u> Incident cases, onward transmission, mortality, resource use</p>                                                                                                                                     | <p>1) The review type changed (improved) from rapid review to systematic review.</p> <p>2) The number of databases for the literature search was slightly reduced, but main databases covered.</p> <p>Overall: No major concerns.</p> |

|     |                                                                                                                                                                                                                                                                                                                                                                                                                                                                                                                                              |                                                                                                                                                                                                                                                                                                                                                                                            |                                                                                                                                                                                                                                                                                                                                                                     |                                                                                                                                                                                                                                                                                                                                                                    |
|-----|----------------------------------------------------------------------------------------------------------------------------------------------------------------------------------------------------------------------------------------------------------------------------------------------------------------------------------------------------------------------------------------------------------------------------------------------------------------------------------------------------------------------------------------------|--------------------------------------------------------------------------------------------------------------------------------------------------------------------------------------------------------------------------------------------------------------------------------------------------------------------------------------------------------------------------------------------|---------------------------------------------------------------------------------------------------------------------------------------------------------------------------------------------------------------------------------------------------------------------------------------------------------------------------------------------------------------------|--------------------------------------------------------------------------------------------------------------------------------------------------------------------------------------------------------------------------------------------------------------------------------------------------------------------------------------------------------------------|
| 7.  | <p><b>Al-Moraissi, 2020</b><br/>Link to the PROSPERO: <a href="https://dx.doi.org/10.1101/2020.11.20.20235333">192912</a><br/>Link to the fulltext: <a href="https://dx.doi.org/10.1101/2020.11.20.20235333">https://dx.doi.org/10.1101/2020.11.20.20235333</a></p>                                                                                                                                                                                                                                                                          | <p><u>Review type:</u> Systematic review<br/><u>Predefined databases to be searched:</u> Medline, EMBASE, CINAHL, CENTRAL, and Scopus<br/><u>Predefined risk of bias:</u> Authors only referred to the GRADE assessment.<br/><u>Predefined main outcomes:</u> Effectiveness of PPE against COVID-19 (not further predefined)</p>                                                           | <p><u>Review type/methodology:</u> Systematic review (preprint)<br/><u>Databases searched:</u> Medline, EMBASE, CINAHL, CENTRAL, and Scopus<br/><u>Risk of bias:</u> Because there was extreme heterogeneity among the included studies, RoB assessment was not conducted<br/><u>Main outcomes:</u> Effectiveness of PPE against COVID-19 (not further defined)</p> | <p>No changes in the methodology were identified.<br/><br/>Overall: No major concerns.</p>                                                                                                                                                                                                                                                                         |
| 8.  | <p><b>Bertoncello, 2020</b><br/>Link to the PROSPERO: <a href="https://www.researchgate.net/publication/346967846">180264</a><br/>Link to the fulltext: <a href="https://www.researchgate.net/publication/346967846">https://www.researchgate.net/publication/346967846</a> <i>Personal Protective Equipment to Prevention of COVID-19 in Health Workers A Review</i><br/>(Note: The CRD was not provided in the fulltext. However, by a comparison of PICO, methodology and authors, we could assign this review to the PROSPERO entry)</p> | <p><u>Review type:</u> Systematic review<br/><u>Predefined databases to be searched:</u> PubMed, Virtual Health Library, SciELO Brazil, Web of Science, Google Scholar (three first pages), CAPES portal<br/><u>Predefined risk of bias:</u> Authors only referred to the GRADE assessment, ROBINS-I for observational studies<br/><u>Predefined main outcomes:</u> COVID-19 infection</p> | <p><u>Review type/methodology:</u> Review (peer-reviewed journal publication)<br/><u>Databases searched:</u> Pubmed, Virtual Health Library, SciELO Brazil, Scopus, Web of Science, Google Scholar (three first pages)<br/><u>Risk of bias:</u> Not assessed<br/><u>Main outcomes:</u> an outcome in the safety of health workers</p>                               | <p>1) The review type changed from systematic review to a (non-systematic) "Review" in a peer-reviewed journal article.<br/>2) GRADE assessment of certainty of the evidence was not conducted (meta-analysis was not deemed possible)<br/>3) The outcome changed substantially<br/><br/>Overall: Some concerns regarding the selection of the reported result</p> |
| 9.  | <p><b>Morales Ferrer, 2020</b><br/>Link to the PROSPERO: <a href="https://dx.doi.org/10.31219/osf.io/uz4rs">188674</a><br/>Link to the fulltext: <a href="https://dx.doi.org/10.31219/osf.io/uz4rs">https://dx.doi.org/10.31219/osf.io/uz4rs</a></p>                                                                                                                                                                                                                                                                                         | <p><u>Review type:</u> Systematic review<br/><u>Predefined databases to be searched:</u> COVID-19 L-OVE, Medline, CENTRAL, EMBASE, WHO ICTRP<br/><u>Predefined risk of bias:</u> RoB 2.0 for RCTs, ROBINS-I for non-RCTs<br/><u>Predefined main outcomes:</u> COVID-19 cases</p>                                                                                                           | <p><u>Review type/methodology:</u> Living systematic review (preprint)<br/><u>Databases searched:</u> COVID-19 L-OVE<br/><u>Risk of bias:</u> Joanna Briggs Institute Checklist for Analytical Cross Sectional Studies<br/><u>Main outcomes:</u> COVID-19 cases</p>                                                                                                 | <p>1) The review type changed (improved) to Living systematic review,<br/>2) CENTRAL (not included in COVID-19 L-OVE) was not searched<br/><br/>Overall: No concerns</p>                                                                                                                                                                                           |
| 10. | <p><b>Khera, 2020</b><br/>Link to the PROSPERO: <a href="https://dx.doi.org/10.21203/rs.3.rs-97073/v1">204466</a><br/>Link to the fulltext: <a href="https://dx.doi.org/10.21203/rs.3.rs-97073/v1">https://dx.doi.org/10.21203/rs.3.rs-97073/v1</a></p>                                                                                                                                                                                                                                                                                      | <p><u>Review type:</u> Systematic review and meta-analysis<br/><u>Predefined databases to be searched:</u> CENTRAL, Medline, ClinicalTrials.gov, preprint servers<br/><u>Predefined risk of bias:</u> Cochrane RoB-2 for RCTs, ROBINS-I for observational studies<br/><u>Predefined main outcomes:</u> Mortality, number of cases</p>                                                      | <p><u>Review type/methodology:</u> Systematic review and meta-analysis (preprint)<br/><u>Databases searched:</u> Medline, Cochrane Library, ClinicalTrials.gov<br/><u>Risk of bias:</u> Not reported<br/><u>Main outcomes:</u> Mortality, number of cases</p>                                                                                                       | <p>1) Risk of bias was not assessed, neither using RoB-2 nor ROBINS-I as was the plan.<br/><br/>Overall: Some concerns regarding missing risk of bias assessment.</p>                                                                                                                                                                                              |

|     |                                                                                                                                                                                                                                                                                                                                                         |                                                                                                                                                                                                                                                                                                                                                                                                                                                                                |                                                                                                                                                                                                                                                                                                                                                                                                                                                                                                                                                      |                                                                                                                                                                                                                                                                                         |
|-----|---------------------------------------------------------------------------------------------------------------------------------------------------------------------------------------------------------------------------------------------------------------------------------------------------------------------------------------------------------|--------------------------------------------------------------------------------------------------------------------------------------------------------------------------------------------------------------------------------------------------------------------------------------------------------------------------------------------------------------------------------------------------------------------------------------------------------------------------------|------------------------------------------------------------------------------------------------------------------------------------------------------------------------------------------------------------------------------------------------------------------------------------------------------------------------------------------------------------------------------------------------------------------------------------------------------------------------------------------------------------------------------------------------------|-----------------------------------------------------------------------------------------------------------------------------------------------------------------------------------------------------------------------------------------------------------------------------------------|
| 11. | <p><b>Singh, 2021</b><br/>Link to the PROSPERO: <a href="https://www.cochranelibrary.com/cdsr/doi/10.1002/14651858.CD013587.pub2/full">185220</a><br/>Link to the fulltext: <a href="https://www.cochranelibrary.com/cdsr/doi/10.1002/14651858.CD013587.pub2/full">https://www.cochranelibrary.com/cdsr/doi/10.1002/14651858.CD013587.pub2/full</a></p> | <p><u>Review type:</u> Systematic review<br/><u>Predefined databases to be searched:</u> CENTRAL, Medline, EMBASE, controlled-trials.com, COVID-NMA.com, Cochrane COVID-19 Study register<br/><u>Predefined risk of bias:</u> Cochrane RoB tool<br/><u>Predefined main outcomes:</u> Cases (confirmed), production of antibodies to SARS-CoV-2</p>                                                                                                                             | <p><u>Review type/methodology:</u> Cochrane review<br/><u>Databases searched:</u> CENTRAL, Medline, EMBASE, controlled-trials.com, WHO ICTRP, COVID-NMA.com, Cochrane COVID-19 Study Register<br/><u>Risk of bias:</u> No eligible trials were identified<br/><u>Main outcomes:</u> Cases (confirmed), production of antibodies to SARS-CoV-2</p>                                                                                                                                                                                                    | <p>No changes in the methodology were identified.</p> <p>For the second objective of this systematic review (prevention of COVID-19), no eligible trials were identified. Therefore, no data synthesis or risk of bias assessment was conducted.</p> <p>Overall: No major concerns.</p> |
| 12. | <p><b>Bassatne, 2021</b><br/>Link to the PROSPERO: <a href="https://dx.doi.org/10.1016/j.metabol.2021.154753">203960</a><br/>Link to the fulltext: <a href="https://dx.doi.org/10.1016/j.metabol.2021.154753">https://dx.doi.org/10.1016/j.metabol.2021.154753</a></p>                                                                                  | <p><u>Review type:</u> Systematic review and meta-analysis<br/><u>Predefined databases to be searched:</u> Medline, EMBASE, CINAHL, Cochrane Library, ClinicalTrials.gov, WHO primary trial registries<br/><u>Predefined risk of bias:</u> Cochrane RoB tool (version 1) for clinical trials, Newcastle-Ottawa quality scale for observational studies<br/><u>Predefined main outcomes:</u> Mortality</p>                                                                      | <p><u>Review type/methodology:</u> Systematic review and meta-analysis (peer-reviewed journal publication)<br/><u>Databases searched:</u> Medline, EMBASE, CINAHL, Cochrane Library, ClinicalTrials.gov, WHO primary trial registries, Australian New Zealand Clinical Trial Registry (ANZCTR), Iranian Registry of Clinical Trials (IRCT)<br/><u>Risk of bias:</u> Cochrane RoB tool (version 1) for clinical trials, Newcastle-Ottawa quality scale for observational studies<br/><u>Main outcomes:</u> Mortality rate from COVID-19 infection</p> | <p>1) Four databases providing trial registries were additionally searched and<br/>2) The main outcome was clearer defined in the final manuscript than was the case in the protocol.</p> <p>Overall: No major concerns.</p>                                                            |
| 13. | <p><b>Burela, 2020</b><br/>Link to the PROSPERO: <a href="https://dx.doi.org/10.17843/rmpesp.2020.374.6330">200641</a><br/>Link to the fulltext: <a href="https://dx.doi.org/10.17843/rmpesp.2020.374.6330">https://dx.doi.org/10.17843/rmpesp.2020.374.6330</a></p>                                                                                    | <p><u>Review type:</u> Systematic review<br/><u>Predefined databases to be searched:</u> Medline, EMBASE, CINAHL, Cochrane Library, Web of Science, LILACS, SciELO, Google Scholar, clinical trial registries, pre-print server<br/><u>Predefined risk of bias:</u> Cochrane RoB tool for RCTs, Newcastle-Ottawa Scale for observational studies<br/><u>Predefined main outcomes:</u> Any type of outcome measures that could reflect the prevention and clinical efficacy</p> | <p><u>Review type/methodology:</u> Systematic review<br/><u>Databases searched:</u> Medline, EMBASE, CINAHL, Cochrane Library, Web of Science, LILACS, SciELO, Google Scholar, clinical trial registries, preprint repositories<br/><u>Risk of bias:</u> No study was identified<br/><u>Main outcomes:</u> Any type of outcome measures that could reflect the prevention and clinical efficacy</p>                                                                                                                                                  | <p>No changes in the methodology were identified.</p> <p>As no primary study was deemed eligible for inclusion, no data synthesis and no risk of bias assessment were conducted.</p> <p>Overall: No major concerns.</p>                                                                 |

AMED=Allied and Complementary Medicine Database; CASP=Critical Appraisal Skills Programme; CENTRAL=Cochrane Central Register of Controlled Trials; CINAHL=Cumulative Index to Nursing and Allied Health Literature; COVID-19=Corona Virus Disease 2019; DOAJ=Directory of Open Access Journals; EBM=Evidence-Based Medicine; EPHPP=Effective Public Health Practice Project; GRADE=Grading of Recommendations, Assessment, Development and Evaluation; ICU=Intensive Care Unit; LILACS=Scientific health information from Latin America and the Caribbean countries

(translated abbreviation); MMAT=Mixed Methods Appraisal Tool; RCTs=Randomized Controlled Trials; RoB=Risk of Bias; ROBINS-I=Cochrane Risk of Bias In Non-Randomised Studies of Interventions; SARS-CoV-2=Severe Acute Respiratory Syndrome Corona Virus 2; SciELO=Scientific Electronic Library Online; SWiM=Synthesis without meta-analysis (reporting guideline for narrative data synthesis); WHO=World Health Organization; WHO ICTRP=World Health Organization International Clinical Trials Registry Platform; WHO SEARO=World Health Organization South-East Asia Regional Office

\* Differences that may have impact on the validity of the published report are indicated.
