# Supplementary material for: Characteristics of registered and published systematic reviews focusing on the prevention of COVID-19: a meta-research study
Source: HighWire-hosted journal article supplement (doi:10.1136/bmjopen-2021-060255), 2022-05-01
Supplement: bmjopen-2021-060255supp006_data_supplement.pdf [file bmjopen-2021-060255supp006_data_supplement.pdf]

## S6. Characteristics of Published Systematic Reviews identified in COVID-19 L-OVE for prevention

Table 5 Characteristics of Published Systematic Reviews identified in COVID-19 L-OVE for prevention of COVID-19

| Author, Year                       | Country of affiliation of the review <sup>a</sup> | Review type          | Population                                                          | Intervention                                                                        | Main Outcome(s) reported                                                                      | N studies for COVID-19 included (study types) | Protocol published prior to publication? | Type of publication, Comments (e.g. DOI, Link, PROSPERO registration)                                                                                                                      |
|------------------------------------|---------------------------------------------------|----------------------|---------------------------------------------------------------------|-------------------------------------------------------------------------------------|-----------------------------------------------------------------------------------------------|-----------------------------------------------|------------------------------------------|--------------------------------------------------------------------------------------------------------------------------------------------------------------------------------------------|
| Public health interventions (n=21) |                                                   |                      |                                                                     |                                                                                     |                                                                                               |                                               |                                          |                                                                                                                                                                                            |
| Ayouni, 2021                       | Tunisia                                           | SR                   | general population                                                  | PHI (e.g., social distancing, lockdown, travel restrictions, etc.)                  | transmission of COVID-19 (effectiveness in preventing and controlling the spread of COVID-19) | 18 (2 ITS, 16 NRSI)                           | Yes, PROSPERO                            | journal publication<br>10.1186/s12889-021-11111-1<br>CRD42020196018                                                                                                                        |
| Burns, 2020                        | Germany                                           | rapid SR             | travellers (general population)                                     | travel-related control measures during the COVID-19 pandemic, or SARS, MERS         | effectiveness                                                                                 | 13 (NRSI), 49 (MS)                            | Yes, peer-reviewed Cochrane protocol     | Cochrane review<br><a href="https://www.cochranelibrary.com/cdsr/doi/10.1002/14651858.CD013717.pub2/full">https://www.cochranelibrary.com/cdsr/doi/10.1002/14651858.CD013717.pub2/full</a> |
| Chetty, 2020                       | South Africa                                      | rapid SR             | travelling populations (general population)                         | travel screening practices (e.g., body temperature measures, airport screening,...) | effectiveness                                                                                 | 0; 4 (MS)                                     | No                                       | journal publication<br>10.7196/SAMJ.2020.v110i1.1.14959                                                                                                                                    |
| Chisale, 2020                      | Malawi                                            | SR                   | population in low- and middle-income countries (general population) | community-based interventions to prevent COVID-19 transmission                      | COVID-19 transmission                                                                         | 6 (NRSI)                                      | Yes, PROSPERO                            | preprint<br>10.21203/rs.3.rs-98441/v1<br>CRD42020204984                                                                                                                                    |
| Chu, 2020                          | Canada                                            | SR, MA               | people in healthcare or non-healthcare settings (mixed population)  | social distancing, face mask, eye protection                                        | person-to-person transmission of COVID-19, SARS, MERS                                         | 64 (NRSI)                                     | Yes, PROSPERO                            | journal publication and preprint<br>10.1016/S0140-6736(20)31142-9<br>CRD42020177047                                                                                                        |
| Chung, 2020                        | UK                                                | rapid SR, case study | n.r. (most likely general population)                               | testing, contact tracing, isolation policies                                        | COVID-19 prevention and control                                                               | n.r. (48 with SR, guidelines also included)   | No                                       | preprint<br>10.1101/2020.06.04.20122614                                                                                                                                                    |
| Frazer, 2020                       | Ireland                                           | rapid SR             | older people in long term care facilities, employees, visitors      | any intervention to reduce transmission, e.g., facility                             | transmission of COVID-19, SARS, MERS                                                          | 34 (NRSI)                                     | Yes, PROSPERO                            | preprint<br>10.1101/2020.10.29.20222182                                                                                                                                                    |

|                             |                           |          |                                                                                                               |                                                                                             |                                                                      |                    |               |                                                                                                                                                                                                                                           |
|-----------------------------|---------------------------|----------|---------------------------------------------------------------------------------------------------------------|---------------------------------------------------------------------------------------------|----------------------------------------------------------------------|--------------------|---------------|-------------------------------------------------------------------------------------------------------------------------------------------------------------------------------------------------------------------------------------------|
|                             |                           |          | (high risk population)                                                                                        | measures, PPE, hygiene, social distancing                                                   |                                                                      |                    |               | CRD42020191569                                                                                                                                                                                                                            |
| Girum, 2020                 | Ethiopia                  | SR       | persons after exposure to COVID-19 or at high risk or living in areas with an outbreak (high risk population) | contact tracing, screening, quarantine, isolation                                           | effectiveness for COVID-19 prevention (incidence, transmission, ...) | 9 (NRSI), 13 (MS)  | No            | journal publication<br>10.1186/541182-020-00285-W                                                                                                                                                                                         |
| Grépin, 2020                | China                     | rapid SR | travelling populations during COVID-19 pandemic (general population)                                          | travel-related measures (e.g. travel advice, entry and exit screening, ...)                 | no restrictions (e.g. epidemiological, non-epidemiological outcomes) | 3 (NRSI), 26 (MS)  | No            | journal publication and preprint<br><a href="https://doi.org/10.1136/bmjgh-2020-004537">10.1136/bmjgh-2020-004537</a>                                                                                                                     |
| Johanna, 2020               | Indonesia                 | SR, MA   | general population during COVID-19 pandemic                                                                   | mass screening, lockdown, combination of both                                               | COVID-19 prevention (transmission, incidence, ...)                   | 4 (NRSI), 10 (MS)  | Yes, PROSPERO | journal publication<br>10.4081/jphr.2020.2011<br>CRD42020190546                                                                                                                                                                           |
| Juneau, 2020                | USA, COVID-19 Work Group  | SR       | n.r. (most likely general population)                                                                         | contact tracing                                                                             | effectiveness                                                        | 14 (NRSI), 18 (MS) | Yes, PROSPERO | preprint<br>10.1101/2020.07.23.20160234<br>CRD42020198462                                                                                                                                                                                 |
| Marasinghe, 2020            | USA                       | SR       | individuals not medically diagnosed with COVID-19 (general population)                                        | public health recommendation for face masks                                                 | effectiveness in limiting the spread of COVID-19                     | 0                  | No            | journal publication and preprint<br>10.14202/IJOH.2020.109-117<br>10.21203/rs.3.rs-16701/v3                                                                                                                                               |
| Mayr, 2020                  | Austria                   | rapid SR | contacts of infected cases; travellers, general population (COVID-10, SARS, MERS) (mixed population)          | quarantine with or without other public health measures                                     | effectiveness in suppression of COVID-19 outbreak                    | 0; 10 (MS)         | No            | journal publication<br>10.1055/A-1164-6611                                                                                                                                                                                                |
| Mbwogge, 2021               | UK                        | rapid SR | general population                                                                                            | mass testing with contact tracing vs testing of symptomatic individuals and contact tracing | effectiveness in suppression of COVID-19 outbreak                    | 1 (NRSI), 11 (MS)  | No            | journal publication and preprint<br>10.2196/27254                                                                                                                                                                                         |
| Muhammed, 2020              | Iraq                      | rapid SR | n.r. (most likely general population)                                                                         | school closure                                                                              | transmission of COVID-19 in the general population                   | 3 (NRSI), 5 (MS)   | No            | journal publication<br>10.24017/COVID.12                                                                                                                                                                                                  |
| Public Health England, 2021 | Public Health England, UK | rapid SR | individuals in school setting (school population)                                                             | school based interventions (e.g., cohorting, distancing)                                    | transmission of COVID-19                                             | 41 (NRSI), 15 (MS) | Yes, PROSPERO | update<br><a href="https://phe.koha-ptfs.co.uk/cgi-bin/koha/opac-retrieve-file.pl?id=9adedb17d5622f9cd7e42febca9ad">https://phe.koha-ptfs.co.uk/cgi-bin/koha/opac-retrieve-file.pl?id=9adedb17d5622f9cd7e42febca9ad</a><br>CRD42020191867 |
| Putri, 2020                 | Indonesia                 | SR       | healthcare workers, not infected (high risk population)                                                       | preventive actions (social distancing, using PPE, handwashing, screening, etc.)             | transmission of COVID-19                                             | 7 (n.r.)           | No            | journal publication<br>10.19106/JMEDSCISI005203202013                                                                                                                                                                                     |

|                                            |         |          |                                                                                       |                                                                               |                                                                                                                                                                    |                                                                      |                                          |                                                                                  |
|--------------------------------------------|---------|----------|---------------------------------------------------------------------------------------|-------------------------------------------------------------------------------|--------------------------------------------------------------------------------------------------------------------------------------------------------------------|----------------------------------------------------------------------|------------------------------------------|----------------------------------------------------------------------------------|
| Regmi, 2021                                | UK      | SR       | any population during COVID-19 pandemic (mixed population)                            | PHI (isolation, social distance, quarantine)                                  | COVID-19 incidence, risk of transmission reduction                                                                                                                 | 33 (NRSI)                                                            | Yes, PROSPERO and peer-reviewed protocol | journal publication<br>10.3390/ijerph18084274<br>CRD42020207338                  |
| Viner, 2020                                | UK      | rapid SR | population during COVID-19, SARS, MERS outbreaks (general population)                 | school closure                                                                | effectiveness in limiting the spread of COVID-19                                                                                                                   | 4 (NRSI), 1 (MS)                                                     | No                                       | journal publication and preprint<br>10.1016/S2352-4642(20)30095-X                |
| Viswanathan, 2020                          | USA     | rapid SR | general populations with unknown prevalence of SARS-coV-2                             | universal screening (mass screening) for SARS-CoV-2 infection vs no screening | effectiveness and screening test accuracy                                                                                                                          | 2 (MS, effectiveness); 17 (NRSI or DTA studies), 3 (MS, DTA studies) | Yes, OSF.io                              | Cochrane Review<br>10.1002/14651858.CD013718                                     |
| Walsh, 2021                                | UK      | SR       | general population                                                                    | school closures, reopening, school holidays                                   | transmission of COVID-19                                                                                                                                           | 40 (NRSI)                                                            | Yes, PROSPERO                            | preprint<br>10.1101/2021.01.02.21249146<br>CRD42020213699                        |
| <b>Personal protective equipment (n=8)</b> |         |          |                                                                                       |                                                                               |                                                                                                                                                                    |                                                                      |                                          |                                                                                  |
| Al-Moraissi, 2020                          | Yemen   | rapid SR | adult dental health care workers (high risk population)                               | respirators vs surgical masks                                                 | effectiveness against transmission of COVID-19, SARS, MERS                                                                                                         | 0                                                                    | Yes, PROSPERO                            | preprint<br>10.1101/2020.11.20.20235333<br>CRD42020192912                        |
| de Camargo, 2020                           | Brasil  | rapid SR | general population; SARS, MERS, COVID-19                                              | non-woven face mask (surgical masks, N95, FFP) vs no use                      | prevention of coronavirus infections (efficacy of protection)                                                                                                      | 0                                                                    | No                                       | journal publication and preprint<br>10.1590/1413-81232020259.13622020            |
| Dehaghi, 2020                              | Iran    | SR       | patients with COVID-19, individuals with high risk or exposure (high risk population) | face masks (N95, surgical, cotton)                                            | different (transmission)                                                                                                                                           | 5 (NRSI)                                                             | No                                       | journal publication<br>10.17533/UDEA.IEE.V38N2E13                                |
| Gross, 2021                                | Germany | rapid SR | healthcare workers, not infected (high risk population)                               | any preventive measures (e.g. PPE, hand hygiene)                              | benefits (in terms of COVID-19 infection) and risks (e.g. headache or facial skin lesions due to N95 respirators) of preventive measures in the healthcare setting | 13 (NRSI)                                                            | No                                       | journal publication<br>10.1136/bmjopen-2020-042270                               |
| Li, 2020                                   | USA     | SR, MA   | Any population (mixed population)                                                     | face masks                                                                    | transmission of COVID-19                                                                                                                                           | 6 (NRSI)                                                             | Yes, PROSPERO                            | journal publication and preprint<br>10.1016/j.ajic.2020.12.007<br>CRD42020211862 |

|                                           |         |                |                                                                                            |                                                   |                                                                                |                             |                                          |                                                                                                                       |
|-------------------------------------------|---------|----------------|--------------------------------------------------------------------------------------------|---------------------------------------------------|--------------------------------------------------------------------------------|-----------------------------|------------------------------------------|-----------------------------------------------------------------------------------------------------------------------|
| Morales Ferrer, 2021                      | Chile   | living SR      | healthy population (general population)                                                    | gloves                                            | COVID-19 infections, hospitalisation, safety                                   | 1 (NRSI)                    | Yes, PROSPERO and peer-reviewed protocol | preprint <a href="https://osf.io/uz4rs">10.31219/osf.io/uz4rs</a><br>CRD42020188674                                   |
| Rohde, 2020                               | Ireland | rapid SR       | community and household setting (general population)                                       | face masks                                        | effectiveness in prevention of SARS-CoV-2 transmission                         | 7 (NRSI)                    | No                                       | preprint 10.12688/HRBOPENRES.13161.1                                                                                  |
| Tabatabaei zadeh, 2021                    | Iran    | SR, MA         | asymptomatic individuals without COVID-19 and COVID-19 patients (high risk population)     | face masks                                        | transmission of COVID-19 (risk of COVID-19 infection)                          | 4 (n.r.)                    | No                                       | journal publication 10.1186/s40001-020-00475-6                                                                        |
| <b>Vaccination (n=8)</b>                  |         |                |                                                                                            |                                                   |                                                                                |                             |                                          |                                                                                                                       |
| Alimehmeti, 2021                          | Albania | SR             | n.r. (phase III clinical trials) (most likely general population)                          | COVID-19 vaccines                                 | clinical efficacy and safety                                                   | 3 (phase III)               | No                                       | journal publication 10.32391/AJTES.V5i1.178                                                                           |
| Del Riccio, 2020                          | Italy   | SR             | general population                                                                         | influenza vaccination                             | risk of SARS-CoV-2 infection, severity, death                                  | 12 (NRSI)                   | No                                       | journal publication and preprint 10.3390/ijerph17217870                                                               |
| Kaur, 2021                                | India   | SR             | any population during COVID-19 pandemic (mixed population)                                 | COVID-19 vaccines                                 | safety                                                                         | 11 (RCT, NRSI)              | No                                       | journal publication 10.1007/s12291-021-00968-z                                                                        |
| Khera, 2020                               | India   | SR, MA         | countries with universal BCG vaccination policy vs. countries without (general population) | BCG vaccination                                   | protection against COVID-19 infection, incidence, mortality                    | 28 (NRSI)                   | Yes, PROSPERO                            | preprint 10.21203/rs.3.rs-97073/v1<br>CRD42020204466                                                                  |
| Pormohamad, 2021                          | Canada  | SR, MA         | n.r. (most likely general population)                                                      | COVID-19 vaccines                                 | efficacy, safety                                                               | 25 (RCT, phase I-III)       | No                                       | journal publication <a href="https://pubmed.ncbi.nlm.nih.gov/34066475/">https://pubmed.ncbi.nlm.nih.gov/34066475/</a> |
| Sathian, 2021                             | Qatar   | SR, MA         | healthy adults (18+) (general population)                                                  | COVID-19 vaccines                                 | safety, immunogenicity                                                         | 14 (RCT, NRSI, phase I-III) | Yes, OSF.io                              | journal publication 10.3126/nje.v11i1.36163                                                                           |
| Xing, 2021 <sup>b</sup>                   | China   | SR             | healthy adults (18+) (general population)                                                  | COVID-19 vaccines                                 | efficacy, safety                                                               | 13 (RCT)                    | No                                       | journal publication 10.7499/j.issn.1008-8830.2101133                                                                  |
| Yuan, 2021                                | China   | SR, MA         | healthy adults (18+), without history of SARS or COVID-19 (general population)             | COVID-19 vaccines                                 | safety, tolerability, immunogenicity                                           | 5 (RCT)                     | No                                       | preprint 10.2139/ssrn.3746259                                                                                         |
| <b>Pharmaceutical interventions (n=9)</b> |         |                |                                                                                            |                                                   |                                                                                |                             |                                          |                                                                                                                       |
| Bartoszkowski, 2021                       | Canada  | living SR, NMA | people at risk of COVID-19 (pre-, post-exposure status and risk groups) (mixed population) | drugs for prophylaxis (HCQ, CQ, ivermectin, etc.) | effectiveness on COVID-19 (e.g. incidence, mortality) and SARS-CoV-2 infection | 11 (RCT)                    | No                                       | journal publication and preprint 10.1136/bmj.n949                                                                     |

|                                  |                                        |               |                                                                                                                   |                                                                                                                |                                                                                                                  |                                         |                                                   |                                                                                                                                                                                           |
|----------------------------------|----------------------------------------|---------------|-------------------------------------------------------------------------------------------------------------------|----------------------------------------------------------------------------------------------------------------|------------------------------------------------------------------------------------------------------------------|-----------------------------------------|---------------------------------------------------|-------------------------------------------------------------------------------------------------------------------------------------------------------------------------------------------|
| Bryant, 2021                     | UK                                     | SR, MA        | patients with COVID-19, individuals with exposure or high risk (high risk population)                             | ivermectin                                                                                                     | clinical efficacy and safety, incidence                                                                          | post-exposure/high risk: 3 (RCT)        | Yes, self-published (via tinyurl.com)             | journal publication and preprint<br>10.1097/MJT.0000000000001402                                                                                                                          |
| Ford, 2020                       | Switzerland, World Health Organization | SR            | patients with COVID-19, SARS or MERS, individuals with exposure (high risk population)                            | antiretroviral drugs (lopinavir/ritonavir, and others)                                                         | clinical efficacy and safety, incidence, transmission rate, ... (any clinical outcome)                           | post-exposure: 1 NRSI                   | No                                                | journal publication<br>10.1002/JIA2.25489                                                                                                                                                 |
| García-Albéniz, 2020             | USA; Spain                             | SR, MA        | pre- or post-exposure, PCR-negative individuals (mixed population)                                                | HCQ                                                                                                            | COVID-19 infections (Risk Ratio)                                                                                 | 5 (RCT)                                 | No                                                | preprint<br>10.1101/2020.09.29.20203869                                                                                                                                                   |
| Lewis, 2021                      | Canada                                 | SR, MA        | adults with exposure or high risk (high risk population)                                                          | HCQ                                                                                                            | prophylaxis efficacy and safety; transmission, mortality, hospitalization                                        | 4 (RCT)                                 | No                                                | journal publication:<br>10.1371/journal.pone.0244778                                                                                                                                      |
| Rodríguez-Gutiérrez, 2021        | Mexico                                 | living SR, MA | patients with COVID-19 (>16), individuals with exposure (high risk population)                                    | ivermectin                                                                                                     | clinical efficacy and safety                                                                                     | 2 (RCT)                                 | Yes, PROSPERO                                     | preprint<br>10.2139/ssrn.3802499<br>CRD42021235402                                                                                                                                        |
| Shah, 2020                       | India                                  | SR            | n.r. (most likely high risk population)                                                                           | HCQ, CQ                                                                                                        | prophylactic effect                                                                                              | 0                                       | No                                                | journal publication<br>10.1111/1756-185X.13842                                                                                                                                            |
| Singh, 2021                      | UK; Cochrane Infectious Diseases Group | SR, MA        | patients with COVID-19, individuals at risk of exposure or post-exposure (high risk population)                   | CQ, HCQ                                                                                                        | clinical efficacy and safety, incidence, antibodies, transmission (e.g. to household contacts), disease severity | pre-exposure: 0; post-exposure: 2 (RCT) | Yes, PROSPERO and peer-reviewed Cochrane protocol | <a href="https://www.cochranelibrary.com/cdsr/doi/10.1002/14651858.CD013587.pub2/full">https://www.cochranelibrary.com/cdsr/doi/10.1002/14651858.CD013587.pub2/full</a><br>CRD42020185220 |
| Smit, 2021                       | Switzerland                            | SR            | any human population (e.g., high-risk older individuals, healthcare workers, healthy subjects) (mixed population) | pre- or post-exposure prophylaxis for COVID-19 (drug- or biologic-based; dietary supplements, herbal extracts) | impact on SARS-CoV-2 or COVID-19 incidence or prevalence                                                         | 7 (RCT, NRSI)                           | No                                                | journal publication<br>10.1016/j.cmi.2021.01.013                                                                                                                                          |
| <b>Other interventions (n=5)</b> |                                        |               |                                                                                                                   |                                                                                                                |                                                                                                                  |                                         |                                                   |                                                                                                                                                                                           |
| Bassatne, 2020                   | Lebanon                                | SR, MA        | family members of adults with SARS, MERS, COVID-19 (high risk population)                                         | vitamin D                                                                                                      | clinical efficacy and safety, SARS-coV-2 positivity, transmission (to family members), disease severity          | 3 (NRSI)                                | Yes, PROSPERO                                     | journal publication<br>10.1016/j.metabol.2021.154753<br>CRD42020203960                                                                                                                    |
| Burela, 2020                     | Peru                                   | SR            | people of all ages (general population)                                                                           | chlorine dioxide, chlorine derivatives                                                                         | clinical efficacy and safety in preventing or treating COVID-19, SARS, MERS                                      | 0                                       | Yes, PROSPERO                                     | journal publication<br>10.17843/rpmesp.2020.374.6330<br>CRD42020200641                                                                                                                    |

|                      |             |          |                                                                    |                                            |                                            |          |                                      |                                                                                                             |
|----------------------|-------------|----------|--------------------------------------------------------------------|--------------------------------------------|--------------------------------------------|----------|--------------------------------------|-------------------------------------------------------------------------------------------------------------|
| Burton, 2020         | Cochrane UK | SR       | healthcare workers, not infected (high risk population)            | antimicrobial mouthwashes and nasal sprays | incidence, safety                          | 0        | Yes, peer-reviewed Cochrane protocol | Cochrane review<br>10.1002/14651858.CD013626.PUB2                                                           |
| Flores-Genuino, 2020 | Philippines | rapid SR | individuals at risk of exposure to COVID-19 (high risk population) | oral fatty acid supplementation            | any clinical outcome                       | 0        | No                                   | journal publication<br>10.47895/AMP.V5410.2443                                                              |
| Gbinigie, 2020       | UK          | rapid SR | people of all ages (general population)                            | zinc                                       | clinical efficacy and safety (prophylaxis) | 1 (NRSI) | No                                   | preprint<br><a href="https://doi.org/10.12688/wellcomeopenres.16173.1">10.12688/wellcomeopenres.16173.1</a> |

BCG=Bacillus Calmette-Guérin; COVID-19=Corona-Virus Disease 2019; CQ=Chloroquine; CS=Case Studies (case series, case report); DTA=Diagnostic Test Accuracy; HCQ=Hydroxychloroquine; ITS=Interrupted Time-Series; MA=Meta-Analysis; MERS=Middle East Respiratory Syndrome; NMA=Network Meta-Analysis; n.r.=not reported; NRSI=Non-Randomized Studies of Interventions (including, cohort studies, case-control-studies, cross-sectional studies); PPE=Personal Protective Equipment; RCT=Randomized Controlled Trial; SARS (CoV-2)=Severe Acute Respiratory Syndrome (Corona-Virus 2); SR=Systematic Review; UK=United Kingdom; vs.=versus  
<sup>a</sup>country of institutional affiliation of corresponding and/or first author  
<sup>b</sup>Extraction is based solely on data presented in the abstract, as the full text is only available in Chinese
